# Supplementary material for: Logistic LASSO regression for the diagnosis of breast cancer using clinical demographic data and the BI-RADS lexicon for ultrasonography
Source: PubMed Central journal article supplement — Ultrasonography. 2017 Apr 14;37(1):36–42. doi: 10.14366/usg.16045 (PMC5769953; doi:10.14366/usg.16045), 2017-04-14
Supplement: usg-16045-supple1.pdf [file usg-16045-supple1.pdf]

**Supplementary Table 1. Clinical demographic data of patients**

| Variable                     | Type       | Description                                                                                       |
|------------------------------|------------|---------------------------------------------------------------------------------------------------|
| Age                          | Continuous | Age                                                                                               |
| Symptom                      | Category   | 1: no symptom<br>2: pain<br>3: mass or lump<br>4: discharge                                       |
| Size                         | Continuous | Size (mm)                                                                                         |
| Past breast cancer history   | 0–1        |                                                                                                   |
| Breast biopsy                | 0–1        | Breast biopsy for benign disease                                                                  |
| Screening                    | 0–1        | Breast cancer screening history                                                                   |
| Previous breast augmentation | 0–1        |                                                                                                   |
| History of ovary cancer      | 0–1        |                                                                                                   |
| Radiation treatment          | 0–1        | Radiation treatment history                                                                       |
| DM                           | 0–1        | Diabetes mellitus                                                                                 |
| TBC                          | 0–1        | Tuberculosis                                                                                      |
| HT                           | 0–1        | Hypertension                                                                                      |
| Hepatitis                    | 0–1        | Hepatitis                                                                                         |
| Smoking                      | 0–1        | Smoking                                                                                           |
| Alcohol drinking             | Continuous | Drinking (per month)                                                                              |
| Education                    | Category   | 1: elementary school<br>2: middle school<br>3: high school<br>4: university<br>5: graduate school |
| Economic status              | Category   | Economic status<br>1: low<br>2: middle<br>3: high                                                 |
| Occupation                   | 0–1        |                                                                                                   |
| Weight                       | Continuous | Weight (kg)                                                                                       |
| Height                       | Continuous | Height (cm)                                                                                       |
| Menarche                     | Continuous | Age at menarche                                                                                   |
| Menstruation status          | Category   | 0: menopause<br>1: premenopause<br>2: postmenopause                                               |
| Menopause                    | Continuous | Age at menopause                                                                                  |
| Menstruation cycle           | 0–1        | 0: irregular, 1: regular                                                                          |
| Menstruation period          | Continuous | Menstruation cycle (day)                                                                          |
| Ever married                 | 0–1        | History of marriage                                                                               |
| Birth                        | 0–1        | 0: nonparous<br>1: birth experience                                                               |
| First baby                   | Continuous | Age at birth of first baby                                                                        |
| Children                     | Continuous | Number of children                                                                                |
| Breast-feed                  | 0–1        | History of breast-feeding                                                                         |
| Hysterectomy                 | 0–1        | History of hysterectomy                                                                           |
| Oophorectomy                 | 0–1        | History of oophorectomy                                                                           |
| Oral pill                    | 0–1        | History of taking oral contraceptives                                                             |
| HRT                          | 0–1        | Hormone replacement therapy                                                                       |
| Tamoxifen                    | 0–1        | History of taking tamoxifen                                                                       |
| FHx breast cancer            | 0–1        | Family history of breast cancer                                                                   |
| FHx ovary cancer             | 0–1        | Family history of ovary cancer                                                                    |
| FHx cancer                   | 0–1        | Family history of other cancer                                                                    |

DM, diabetes mellitus; TBC, tuberculosis; HT, hypertension; HRT, hormone replacement therapy; FHx, family history.
